# Supplementary material for: Recognition of 5-Hydroxymethylcytosine by the Uhrf1 SRA Domain
Source: PubMed Central journal article supplement (PMC3120858; doi:10.1371/journal.pone.0021306), 2011-06-22
Supplement: pone.0021306.s003.pdf [file pone.0021306.s003.pdf]

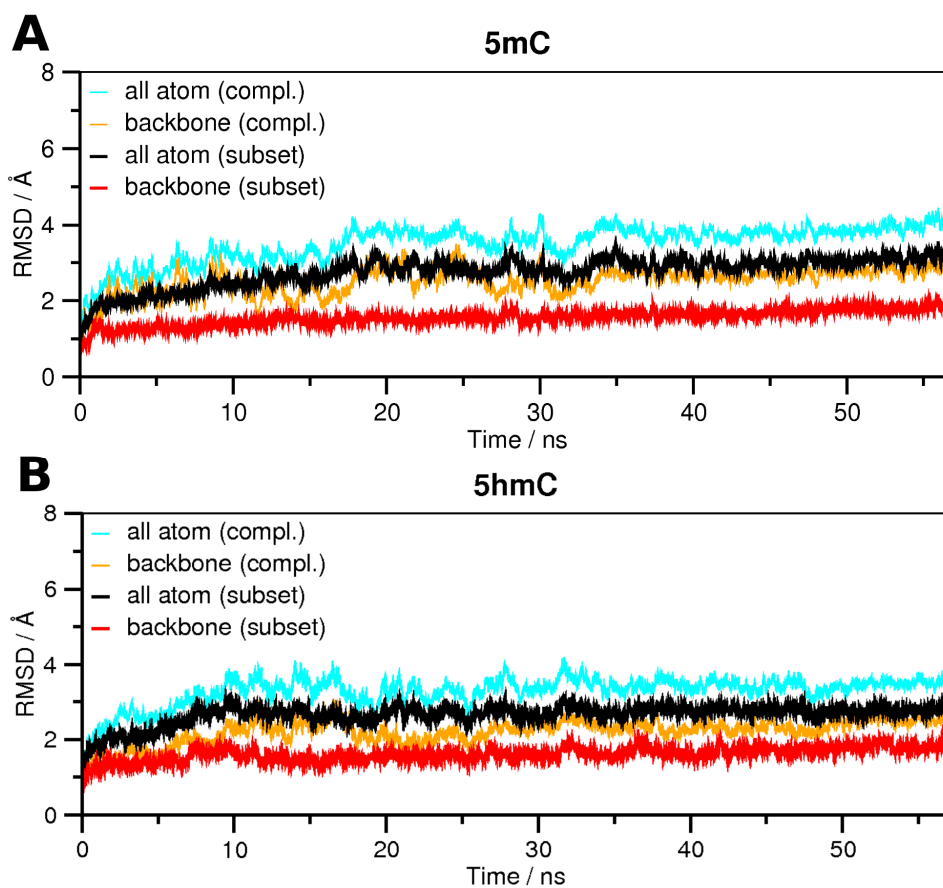

**Supplementary Figure S3. Atom-positional root-mean-square deviation of the protein and DNA backbone atoms during the simulations.** The terminal DNA and protein residues were excluded from the calculations in the “subset” sets (red and black lines).
