# Supplementary material for: Recognition of 5-Hydroxymethylcytosine by the Uhrf1 SRA Domain
Source: PubMed Central journal article supplement (PMC3120858; doi:10.1371/journal.pone.0021306), 2011-06-22
Supplement: pone.0021306.s007.pdf [file pone.0021306.s007.pdf]

**Supplementary Table S1. Sequences of DNA oligonucleotides used for preparation of double stranded fluorescent DNA substrates.**

M: 5-methylcytosine. X: 5-hydroxymethylcytosine.

| <b>Name</b>        | <b>Sequence</b>                                                                 |
|--------------------|---------------------------------------------------------------------------------|
| <b>CGup</b>        | 5' - CTCAACAAC <sup>A</sup> TAAC <sup>T</sup> TACCATCCGGACCAGAAGAGTCATCATGG -3' |
| <b>MGup</b>        | 5' - CTCAACAAC <sup>A</sup> TAAC <sup>T</sup> TACCATCMGGACCAGAAGAGTCATCATGG -3' |
| <b>hmCGup</b>      | 5' - CTCAACAAC <sup>A</sup> TAAC <sup>T</sup> TACCATCXGGACCAGAAGAGTCATCATGG -3' |
| <b>noCGup</b>      | 5' - CTCAACAAC <sup>A</sup> TAAC <sup>T</sup> TACCATCTGGACCAGAAGAGTCATCATGG -3' |
| <b>um550</b>       | 5' - ATTO550-CCATGATGACTCTTCTGGTCCGGATGGTAGTTAGTTGTTGAG -3'                     |
| <b>um590</b>       | 5' - ATTO590-CCATGATGACTCTTCTGGTCCGGATGGTAGTTAGTTGTTGAG -3'                     |
| <b>um647N</b>      | 5' - ATTO647N-CCATGATGACTCTTCTGGTCCGGATGGTAGTTAGTTGTTGAG -3'                    |
| <b>um700</b>       | 5' - ATTO700-CCATGATGACTCTTCTGGTCCGGATGGTAGTTAGTTGTTGAG -3'                     |
| <b>mC700</b>       | 5' - ATTO700-CCATGATGACTCTTCTGGTCMGGATGGTAGTTAGTTGTTGAG -3'                     |
| <b>hmC550</b>      | 5' - ATTO550-CCATGATGACTCTTCTGGTCXGGATGGTAGTTAGTTGTTGAG -3'                     |
| <b>550-Fill-In</b> | 5' - ATTO550-CCATGATGACTCTTCTGGTC -3'                                           |
