# Supplementary material for: Recognition of 5-Hydroxymethylcytosine by the Uhrf1 SRA Domain
Source: PubMed Central journal article supplement (PMC3120858; doi:10.1371/journal.pone.0021306), 2011-06-22
Supplement: pone.0021306.s008.pdf [file pone.0021306.s008.pdf]

**Supplementary Table S2. DNA substrates used for the DNA binding assays.**

| Name    | CpG site                | Label    | Oligo I | Oligo II    | Purification grade and use                  |
|---------|-------------------------|----------|---------|-------------|---------------------------------------------|
| HMB550  | hemimethylated          | ATTO550  | MGup    | um550       | · hybridization of HPLC-purified oligos     |
| HMB700  | hemimethylated          | ATTO700  | MGup    | um700       | · gel-purification                          |
| HhMB700 | hemihydroxymethylated   | ATTO700  | hmCGup  | um700       | · used for data in figure 2 and             |
| FMB700  | fully methylated        | ATTO700  | MGup    | mC700       | supplementary figure 1                      |
| FhMB550 | fully hydroxymethylated | ATTO550  | hmCGup  | hmC550      |                                             |
| noCG550 | no CpG site             | ATTO550  | noCGup  | 550-Fill-In | · primer extension for noCG550              |
| HMB550  | hemimethylated          | ATTO550  | MGup    | um550       | · hybridization of HPLC-purified oligos     |
| HMB647N | hemimethylated          | ATTO647N | MGup    | um647N      | for HMB substrates                          |
|         |                         |          |         |             | · gel-purification                          |
|         |                         |          |         |             | · used for data in supplementary figure 2A  |
| UMB550  | unmethylated            | ATTO550  | CGup    | um550       | · hybridization of HPLC-purified oligos     |
| UMB590  | unmethylated            | ATTO590  | CGup    | um590       | · used for data in supplementary figure 2B, |
| HMB590  | hemimethylated          | ATTO590  | MGup    | um590       | n=2                                         |
| UMB647N | unmethylated            | ATTO647N | CGup    | um647N      | · hybridization of PAGE-purified oligos     |
| UMB700  | unmethylated            | ATTO700  | CGup    | um700       | · used for data in supplementary figure 2B, |
| HMB700  | hemimethylated          | ATTO700  | MGup    | um700       | n=1                                         |
