# Supplementary material for: Recognition of 5-Hydroxymethylcytosine by the Uhrf1 SRA Domain
Source: PubMed Central journal article supplement (PMC3120858; doi:10.1371/journal.pone.0021306), 2011-06-22
Supplement: pone.0021306.s009.pdf [file pone.0021306.s009.pdf]

### Supplementary Table S3. Residue Topology File and parameters used for the 5hmC residue during the simulations.

```

=====
TOPOLOGY (based on 5mC topology from patches: PRES 5MC2 and PRES DEO1)
=====
! 5-hydroxy-methyl cytosine
RESI 5HMC -1.00 !
ATOM P P 1.50 !
ATOM O1P ON3 -0.78 !
ATOM O2P ON3 -0.78 !
ATOM O5' ON2 -0.57 !
ATOM C5' CN8B -0.08 !
ATOM H5' HN8 0.09 !
ATOM H5'' HN8 0.09 !
GROUP !
ATOM C4' CN7 0.16 !
ATOM H4' HN7 0.09 !
ATOM O4' ON6 -0.50 !
ATOM C1' CN7B 0.16 !
ATOM H1' HN7 0.09 !
GROUP !
ATOM N1 NN2 -0.13 !
ATOM C6 CN3 0.05 !
ATOM H6 HN3 0.17 !
ATOM C5 CN3D -0.11 !
ATOM C5M CN9 0.10 !
ATOM H5M1 HN9 0.09 !
ATOM H5M2 HN9 0.09 !
ATOM O3 OH1 -0.66 !
ATOM H3 H 0.43 !
ATOM C2 CN1 0.52 !
ATOM O2 ON1C -0.49 !
ATOM N3 NN3 -0.66 !
ATOM C4 CN2 0.65 !
ATOM N4 NN1 -0.75 !
ATOM H41 HN1 0.37 !
ATOM H42 HN1 0.33 !
GROUP !
ATOM C2' CN8 -0.18 !
ATOM H2'' HN8 0.09 !
ATOM H2' HN8 0.09 !
GROUP !
ATOM C3' CN7 0.01 !
ATOM H3' HN7 0.09 !
ATOM O3' ON2 -0.57 !
BOND P O1P P O2P P O5'
BOND O5' C5' C5' C4' C4' O4' C4' C3' O4' C1'
BOND C1' N1 C1' C2' N1 C2 N1 C6
BOND C2 N3 C4 N4 N4 H41 N4 H42
BOND C4 C5 C2' C3' C3' O3' O3' +P
BOND C1' H1' C2' H2'' C2' H2' C3' H3' C4' H4' C5' H5'
BOND C5' H5'' C6 H6
BOND C5 C5M C5M H5M1 C5M H5M2 C5M O3 O3 H3
ANGL C4 C5 C5M C6 C5 C5M
ANGL C5 C5M H5M1 C5 C5M H5M2 C5 C5M O3 C5M O3 H3
ANGL H5M1 C5M H5M2 H5M1 C5M O3 H5M2 C5M O3
DIHE C5M C5 C4 N3 C5M C5 C4 N4
DIHE C5M C5 C6 H6 C5M C5 C6 N1
DIHE H5M1 C5M C5 C4 H5M1 C5M C5 C6
DIHE H5M2 C5M C5 C4 H5M2 C5M C5 C6
DIHE O3 C5M C5 C4 O3 C5M C5 C6
DIHE H3 O3 C5M C5 H3 O3 C5M H5M2
DIHE H3 O3 C5M H5M1
DOUBLE C2 O2 C5 C6 N3 C4
IMPR C2 N1 N3 O2 C4 N3 C5 N4
IMPR N4 C4 H41 H42
DONO H42 N4
DONO H41 N4
DONO H3 O3
ACCE O2 C2
ACCE N3
ACCE O1P P
ACCE O2P P
ACCE O3'
ACCE O4'

```

ACCE O5'  
ACCE O3

|           |      |      |      |        |        |         |        |        |          |
|-----------|------|------|------|--------|--------|---------|--------|--------|----------|
| BILD -O3' | P    | O5'  | C5'  | 1.6001 | 101.45 | -46.90  | 119.00 | 1.4401 | !alpha   |
| BILD -O3' | O5'  | *P   | O1P  | 1.6001 | 101.45 | -115.82 | 109.74 | 1.4802 |          |
| BILD -O3' | O5'  | *P   | O2P  | 1.6001 | 101.45 | 115.90  | 109.80 | 1.4801 |          |
| BILD P    | O5'  | C5'  | C4'  | 1.5996 | 119.00 | -146.00 | 110.04 | 1.5160 | !beta    |
| BILD O5'  | C5'  | C4'  | C3'  | 1.4401 | 108.83 | 60.00   | 116.10 | 1.5284 | !gamma   |
| BILD C5'  | C4'  | C3'  | O3'  | 1.5160 | 116.10 | 140.00  | 115.12 | 1.4212 | !delta   |
| BILD C4'  | C3'  | O3'  | +P   | 1.5284 | 111.92 | 155.00  | 119.05 | 1.6001 | !epsilon |
| BILD C3'  | O3'  | +P   | +O5' | 1.4212 | 119.05 | -95.20  | 101.45 | 1.5996 | !zeta    |
| BILD O4'  | C3'  | *C4' | C5'  | 1.4572 | 104.06 | -120.04 | 116.10 | 1.5160 |          |
| BILD C2'  | C4'  | *C3' | O3'  | 1.5284 | 100.16 | -124.08 | 115.12 | 1.4212 |          |
| BILD C4'  | C3'  | C2'  | C1'  | 1.5284 | 100.16 | -30.00  | 102.04 | 1.5251 |          |
| BILD C3'  | C2'  | C1'  | N1   | 1.5284 | 101.97 | 147.89  | 113.71 | 1.4896 |          |
| BILD O4'  | C1'  | N1   | C2   | 1.5251 | 113.71 | -97.2   | 125.59 | 1.3783 | !chi     |
| BILD C1'  | C2   | *N1  | C6   | 1.4896 | 117.79 | -180.00 | 120.6  | 1.364  |          |
| BILD C2   | N1   | C6   | C5   | 1.399  | 120.6  | 0.0     | 121.0  | 1.337  |          |
| BILD C6   | N1   | C2   | N3   | 1.364  | 120.6  | 0.0     | 118.9  | 1.356  |          |
| BILD N1   | N3   | *C2  | O2   | 1.399  | 118.9  | 180.0   | 121.9  | 1.237  |          |
| BILD N1   | C2   | N3   | C4   | 1.399  | 118.9  | 0.0     | 120.0  | 1.334  |          |
| BILD C5   | N3   | *C4  | N4   | 1.426  | 121.8  | 180.00  | 118.9  | 1.337  |          |
| BILD N3   | C4   | N4   | H41  | 1.337  | 117.9  | 0.00    | 118.9  | 1.01   |          |
| BILD H41  | C4   | *N4  | H42  | 1.01   | 118.9  | 180.00  | 120.7  | 1.01   |          |
| BILD N1   | C5   | *C6  | H6   | 0.0    | 0.0    | 180.0   | 0.0    | 0.0    |          |
| BILD C1'  | C3'  | *C2' | H2'  | 1.5284 | 102.04 | -114.67 | 110.81 | 1.01   |          |
| BILD O4'  | C2'  | *C1' | H1'  | 0.0    | 0.0    | -115.0  | 0.0    | 0.0    |          |
| BILD C1'  | C3'  | *C2' | H2'' | 0.0    | 0.0    | 115.0   | 0.0    | 0.0    |          |
| BILD C1'  | C3'  | *C2' | H2'  | 0.0    | 0.0    | -115.0  | 0.0    | 0.0    |          |
| BILD C2'  | C4'  | *C3' | H3'  | 0.0    | 0.0    | 115.0   | 0.0    | 0.0    |          |
| BILD C3'  | O4'  | *C4' | H4'  | 0.0    | 0.0    | -115.0  | 0.0    | 0.0    |          |
| BILD C4'  | O5'  | *C5' | H5'  | 0.0    | 0.0    | -115.0  | 0.0    | 0.0    |          |
| BILD C4'  | O5'  | *C5' | H5'' | 0.0    | 0.0    | 115.0   | 0.0    | 0.0    |          |
| BILD C6   | C4   | *C5  | C5M  | 0.0    | 0.0    | 180.0   | 0.0    | 0.0    |          |
| BILD C4   | C5   | C5M  | H5M1 | 0.0    | 0.0    | 180.0   | 0.0    | 0.0    |          |
| BILD C5   | H5M1 | *C5M | H5M2 | 0.0    | 0.0    | -115.0  | 0.0    | 0.0    |          |
| BILD H5M1 | H5M2 | *C5M | O3   | 0.0    | 0.0    | 115.0   | 0.0    | 0.0    |          |
| BILD C4   | C5   | C5M  | O3   | 0.0    | 0.0    | 60.0    | 0.0    | 0.0    |          |
| BILD C5   | C5M  | O3   | H3   | 0.0    | 0.0    | 180.0   | 0.0    | 0.0    |          |

=====

FORCEFIELD PARAMETERS:

=====

...  
BONDS

...  
!added for 5HMC TU\_TCB TH und ISA  
OH1 CN9 428.000 1.4200 ! ACC. TO OH1-CT3

...  
ANGLES

...  
!added for 5HMC TU\_TCB TH und ISA  
OH1 CN9 CN3D 75.700 110.1000 !ACC. TO OH1-CT2-CT2  
OH1 CN9 HN9 45.900 108.8900 !ACC. TO OH1-CT3-HA  
H OH1 CN9 57.500 106.0000 !ACC. TO H-OH1-CT2

...  
DIHEDRALS

...  
!added for 5HMC TU\_TCB TH und ISA  
H OH1 CN9 CN3D 1.3000 1 0.00 !ACC. TO H-OH1-CT2-CT2  
H OH1 CN9 CN3D 0.3000 2 0.00 !ACC. TO H-OH1-CT2-CT2  
H OH1 CN9 CN3D 0.4200 3 0.00 !ACC. TO H-OH1-CT2-CT2  
CN3 CN3D CN9 OH1 0.0 3 0.0 !ACC. TO CN3-CN3D-CN9-HN9  
CN2 CN3D CN9 OH1 0.35 3 0.0 !ACC. TO CN3-CN3D-CN9-HN9  
HN9 CN9 OH1 H 0.1400 3 0.00 !ACC. TO X-CT2-OH1-X

...  
IMPROPER

...
