# Supplementary material for: Recognition of 5-Hydroxymethylcytosine by the Uhrf1 SRA Domain
Source: PubMed Central journal article supplement (PMC3120858; doi:10.1371/journal.pone.0021306), 2011-06-22
Supplement: pone.0021306.s010.pdf [file pone.0021306.s010.pdf]

## Supplementary Material

### Recognition of 5-hydroxymethylcytosine by the Uhrf1 SRA domain

Carina Frauer, Thomas Hoffmann, Sebastian Bultmann, Valentina Casa, M. Cristina Cardoso, Iris Antes and Heinrich Leonhardt

#### Supplementary Tables

##### Supplementary Table S1. Sequences of DNA oligonucleotides used for preparation of double stranded fluorescent DNA substrates.

M: 5-methylcytosine. X: 5-hydroxymethylcytosine.

| Name               | Sequence                                                     |
|--------------------|--------------------------------------------------------------|
| <b>CGup</b>        | 5' - CTCAACAAC TAACTACCATCCGGACCAGAAGAGTCATCATGG -3'         |
| <b>MGup</b>        | 5' - CTCAACAAC TAACTACCATCMGGACCAGAAGAGTCATCATGG -3'         |
| <b>hmCGup</b>      | 5' - CTCAACAAC TAACTACCATCXGGACCAGAAGAGTCATCATGG -3'         |
| <b>noCGup</b>      | 5' - CTCAACAAC TAACTACCATCTGGACCAGAAGAGTCATCATGG -3'         |
| <b>um550</b>       | 5' - ATTO550-CCATGATGACTCTTCTGGTCCGGATGGTAGTTAGTTGTTGAG -3'  |
| <b>um590</b>       | 5' - ATTO590-CCATGATGACTCTTCTGGTCCGGATGGTAGTTAGTTGTTGAG -3'  |
| <b>um647N</b>      | 5' - ATTO647N-CCATGATGACTCTTCTGGTCCGGATGGTAGTTAGTTGTTGAG -3' |
| <b>um700</b>       | 5' - ATTO700-CCATGATGACTCTTCTGGTCCGGATGGTAGTTAGTTGTTGAG -3'  |
| <b>mC700</b>       | 5' - ATTO700-CCATGATGACTCTTCTGGTCMGGATGGTAGTTAGTTGTTGAG -3'  |
| <b>hmC550</b>      | 5' - ATTO550-CCATGATGACTCTTCTGGTCXGGATGGTAGTTAGTTGTTGAG -3'  |
| <b>550-Fill-In</b> | 5' - ATTO550-CCATGATGACTCTTCTGGTC -3'                        |

##### Supplementary Table S2. DNA substrates used for the DNA binding assays.

| Name    | CpG site                | Label    | Oligo I | Oligo II    | Purification grade and use                  |
|---------|-------------------------|----------|---------|-------------|---------------------------------------------|
| HMB550  | hemimethylated          | ATTO550  | MGup    | um550       | · hybridization of HPLC-purified oligos     |
| HMB700  | hemimethylated          | ATTO700  | MGup    | um700       | · gel-purification                          |
| HhMB700 | hemihydroxymethylated   | ATTO700  | hmCGup  | um700       | · used for data in figure 2 and             |
| FMB700  | fully methylated        | ATTO700  | MGup    | mC700       | supplementary figure 1                      |
| FhMB550 | fully hydroxymethylated | ATTO550  | hmCGup  | hmC550      |                                             |
| noCG550 | no CpG site             | ATTO550  | noCGup  | 550-Fill-In | · primer extension for noCG550              |
| HMB550  | hemimethylated          | ATTO550  | MGup    | um550       | · hybridization of HPLC-purified oligos     |
| HMB647N | hemimethylated          | ATTO647N | MGup    | um647N      | · gel-purification                          |
|         |                         |          |         |             | · used for data in supplementary figure 2A  |
| UMB550  | unmethylated            | ATTO550  | CGup    | um550       | · hybridization of HPLC-purified oligos     |
| UMB590  | unmethylated            | ATTO590  | CGup    | um590       | · used for data in supplementary figure 2B, |
| HMB590  | hemimethylated          | ATTO590  | MGup    | um590       | n=2                                         |
| UMB647N | unmethylated            | ATTO647N | CGup    | um647N      | · hybridization of PAGE-purified oligos     |
| UMB700  | unmethylated            | ATTO700  | CGup    | um700       | · used for data in supplementary figure 2B, |
| HMB700  | hemimethylated          | ATTO700  | MGup    | um700       | n=1                                         |

### Supplementary Table S3. Residue Topology File and parameters used for the 5hmC residue during the simulations.

```

=====
TOPOLOGY (based on 5mC topology from patches: PRES 5MC2 and PRES DEO1)
=====
! 5-hydroxy-methyl cytosine
RESI 5HMC -1.00 !
ATOM P P 1.50 !
ATOM O1P ON3 -0.78 !
ATOM O2P ON3 -0.78 !
ATOM O5' ON2 -0.57 !
ATOM C5' CN8B -0.08 !
ATOM H5' HN8 0.09 !
ATOM H5'' HN8 0.09 !
GROUP !
ATOM C4' CN7 0.16 !
ATOM H4' HN7 0.09 !
ATOM O4' ON6 -0.50 !
ATOM C1' CN7B 0.16 !
ATOM H1' HN7 0.09 !
GROUP !
ATOM N1 NN2 -0.13 !
ATOM C6 CN3 0.05 !
ATOM H6 HN3 0.17 !
ATOM C5 CN3D -0.11 !
ATOM C5M CN9 0.10 !
ATOM H5M1 HN9 0.09 !
ATOM H5M2 HN9 0.09 !
ATOM O3 OH1 -0.66 !
ATOM H3 H 0.43 !
ATOM C2 CN1 0.52 !
ATOM O2 ON1C -0.49 !
ATOM N3 NN3 -0.66 !
ATOM C4 CN2 0.65 !
ATOM N4 NN1 -0.75 !
ATOM H41 HN1 0.37 !
ATOM H42 HN1 0.33 !
GROUP !
ATOM C2' CN8 -0.18 !
ATOM H2'' HN8 0.09 !
ATOM H2' HN8 0.09 !
GROUP !
ATOM C3' CN7 0.01 !
ATOM H3' HN7 0.09 !
ATOM O3' ON2 -0.57 !
BOND P O1P P O2P P O5'
BOND O5' C5' C5' C4' C4' O4' C4' C3' O4' C1'
BOND C1' N1 C1' C2' N1 C2' N1 C6
BOND C2 N3 C4 N4 N4 H41 N4 H42
BOND C4 C5 C2' C3' C3' O3' O3' +P
BOND C1' H1' C2' H2'' C2' H2' C3' H3' C4' H4' C5' H5'
BOND C5' H5'' C6 H6
BOND C5 C5M C5M H5M1 C5M H5M2 C5M O3 O3 H3
ANGL C4 C5 C5M C6 C5 C5M
ANGL C5 C5M H5M1 C5 C5M H5M2 C5 C5M O3 C5M O3 H3
ANGL H5M1 C5M H5M2 H5M1 C5M O3 H5M2 C5M O3
DIHE C5M C5 C4 N3 C5M C5 C4 N4
DIHE C5M C5 C6 H6 C5M C5 C6 N1
DIHE H5M1 C5M C5 C4 H5M1 C5M C5 C6
DIHE H5M2 C5M C5 C4 H5M2 C5M C5 C6
DIHE O3 C5M C5 C4 O3 C5M C5 C6
DIHE H3 O3 C5M C5 H3 O3 C5M H5M2
DIHE H3 O3 C5M H5M1
DOUBLE C2 O2 C5 C6 N3 C4
IMPR C2 N1 N3 O2 C4 N3 C5 N4
IMPR N4 C4 H41 H42
DONO H42 N4
DONO H41 N4
DONO H3 O3
ACCE O2 C2
ACCE N3
ACCE O1P P
ACCE O2P P
=====

```

ACCE O3'  
 ACCE O4'  
 ACCE O5'  
 ACCE O3

|           |      |      |      |        |        |         |        |        |          |
|-----------|------|------|------|--------|--------|---------|--------|--------|----------|
| BILD -O3' | P    | O5'  | C5'  | 1.6001 | 101.45 | -46.90  | 119.00 | 1.4401 | !alpha   |
| BILD -O3' | O5'  | *P   | O1P  | 1.6001 | 101.45 | -115.82 | 109.74 | 1.4802 |          |
| BILD -O3' | O5'  | *P   | O2P  | 1.6001 | 101.45 | 115.90  | 109.80 | 1.4801 |          |
| BILD P    | O5'  | C5'  | C4'  | 1.5996 | 119.00 | -146.00 | 110.04 | 1.5160 | !beta    |
| BILD O5'  | C5'  | C4'  | C3'  | 1.4401 | 108.83 | 60.00   | 116.10 | 1.5284 | !gamma   |
| BILD C5'  | C4'  | C3'  | O3'  | 1.5160 | 116.10 | 140.00  | 115.12 | 1.4212 | !delta   |
| BILD C4'  | C3'  | O3'  | +P   | 1.5284 | 111.92 | 155.00  | 119.05 | 1.6001 | !epsilon |
| BILD C3'  | O3'  | +P   | +O5' | 1.4212 | 119.05 | -95.20  | 101.45 | 1.5996 | !zeta    |
| BILD O4'  | C3'  | *C4' | C5'  | 1.4572 | 104.06 | -120.04 | 116.10 | 1.5160 |          |
| BILD C2'  | C4'  | *C3' | O3'  | 1.5284 | 100.16 | -124.08 | 115.12 | 1.4212 |          |
| BILD C4'  | C3'  | C2'  | C1'  | 1.5284 | 100.16 | -30.00  | 102.04 | 1.5251 |          |
| BILD C3'  | C2'  | C1'  | N1   | 1.5284 | 101.97 | 147.89  | 113.71 | 1.4896 |          |
| BILD O4'  | C1'  | N1   | C2   | 1.5251 | 113.71 | -97.2   | 125.59 | 1.3783 | !chi     |
| BILD C1'  | C2   | *N1  | C6   | 1.4896 | 117.79 | -180.00 | 120.6  | 1.364  |          |
| BILD C2   | N1   | C6   | C5   | 1.399  | 120.6  | 0.0     | 121.0  | 1.337  |          |
| BILD C6   | N1   | C2   | N3   | 1.364  | 120.6  | 0.0     | 118.9  | 1.356  |          |
| BILD N1   | N3   | *C2  | O2   | 1.399  | 118.9  | 180.0   | 121.9  | 1.237  |          |
| BILD N1   | C2   | N3   | C4   | 1.399  | 118.9  | 0.0     | 120.0  | 1.334  |          |
| BILD C5   | N3   | *C4  | N4   | 1.426  | 121.8  | 180.00  | 118.9  | 1.337  |          |
| BILD N3   | C4   | N4   | H41  | 1.337  | 117.9  | 0.00    | 118.9  | 1.01   |          |
| BILD H41  | C4   | *N4  | H42  | 1.01   | 118.9  | 180.00  | 120.7  | 1.01   |          |
| BILD N1   | C5   | *C6  | H6   | 0.0    | 0.0    | 180.0   | 0.0    | 0.0    |          |
| BILD C1'  | C3'  | *C2' | H2'  | 1.5284 | 102.04 | -114.67 | 110.81 | 1.01   |          |
| BILD O4'  | C2'  | *C1' | H1'  | 0.0    | 0.0    | -115.0  | 0.0    | 0.0    |          |
| BILD C1'  | C3'  | *C2' | H2'' | 0.0    | 0.0    | 115.0   | 0.0    | 0.0    |          |
| BILD C1'  | C3'  | *C2' | H2'  | 0.0    | 0.0    | -115.0  | 0.0    | 0.0    |          |
| BILD C2'  | C4'  | *C3' | H3'  | 0.0    | 0.0    | 115.0   | 0.0    | 0.0    |          |
| BILD C3'  | O4'  | *C4' | H4'  | 0.0    | 0.0    | -115.0  | 0.0    | 0.0    |          |
| BILD C4'  | O5'  | *C5' | H5'  | 0.0    | 0.0    | -115.0  | 0.0    | 0.0    |          |
| BILD C4'  | O5'  | *C5' | H5'' | 0.0    | 0.0    | 115.0   | 0.0    | 0.0    |          |
| BILD C6   | C4   | *C5  | C5M  | 0.0    | 0.0    | 180.0   | 0.0    | 0.0    |          |
| BILD C4   | C5   | C5M  | H5M1 | 0.0    | 0.0    | 180.0   | 0.0    | 0.0    |          |
| BILD C5   | H5M1 | *C5M | H5M2 | 0.0    | 0.0    | -115.0  | 0.0    | 0.0    |          |
| BILD H5M1 | H5M2 | *C5M | O3   | 0.0    | 0.0    | 115.0   | 0.0    | 0.0    |          |
| BILD C4   | C5   | C5M  | O3   | 0.0    | 0.0    | 60.0    | 0.0    | 0.0    |          |
| BILD C5   | C5M  | O3   | H3   | 0.0    | 0.0    | 180.0   | 0.0    | 0.0    |          |

=====

FORCEFIELD PARAMETERS:

=====

...  
 BONDS

...  
 !added for 5HMC TU\_TCB TH und ISA  
 OH1 CN9 428.000 1.4200 ! ACC. TO OH1-CT3

...  
 ANGLES

...  
 !added for 5HMC TU\_TCB TH und ISA  
 OH1 CN9 CN3D 75.700 110.1000 !ACC. TO OH1-CT2-CT2  
 OH1 CN9 HN9 45.900 108.8900 !ACC. TO OH1-CT3-HA  
 H OH1 CN9 57.500 106.0000 !ACC. TO H-OH1-CT2

...  
 DIHEDRALS

...  
 !added for 5HMC TU\_TCB TH und ISA  
 H OH1 CN9 CN3D 1.3000 1 0.00 !ACC. TO H-OH1-CT2-CT2  
 H OH1 CN9 CN3D 0.3000 2 0.00 !ACC. TO H-OH1-CT2-CT2  
 H OH1 CN9 CN3D 0.4200 3 0.00 !ACC. TO H-OH1-CT2-CT2  
 CN3 CN3D CN9 OH1 0.0 3 0.0 !ACC. TO CN3-CN3D-CN9-HN9  
 CN2 CN3D CN9 OH1 0.35 3 0.0 !ACC. TO CN3-CN3D-CN9-HN9  
 HN9 CN9 OH1 H 0.1400 3 0.00 !ACC. TO X-CT2-OH1-X

...  
 IMPROPER

...

## Supplementary Figures

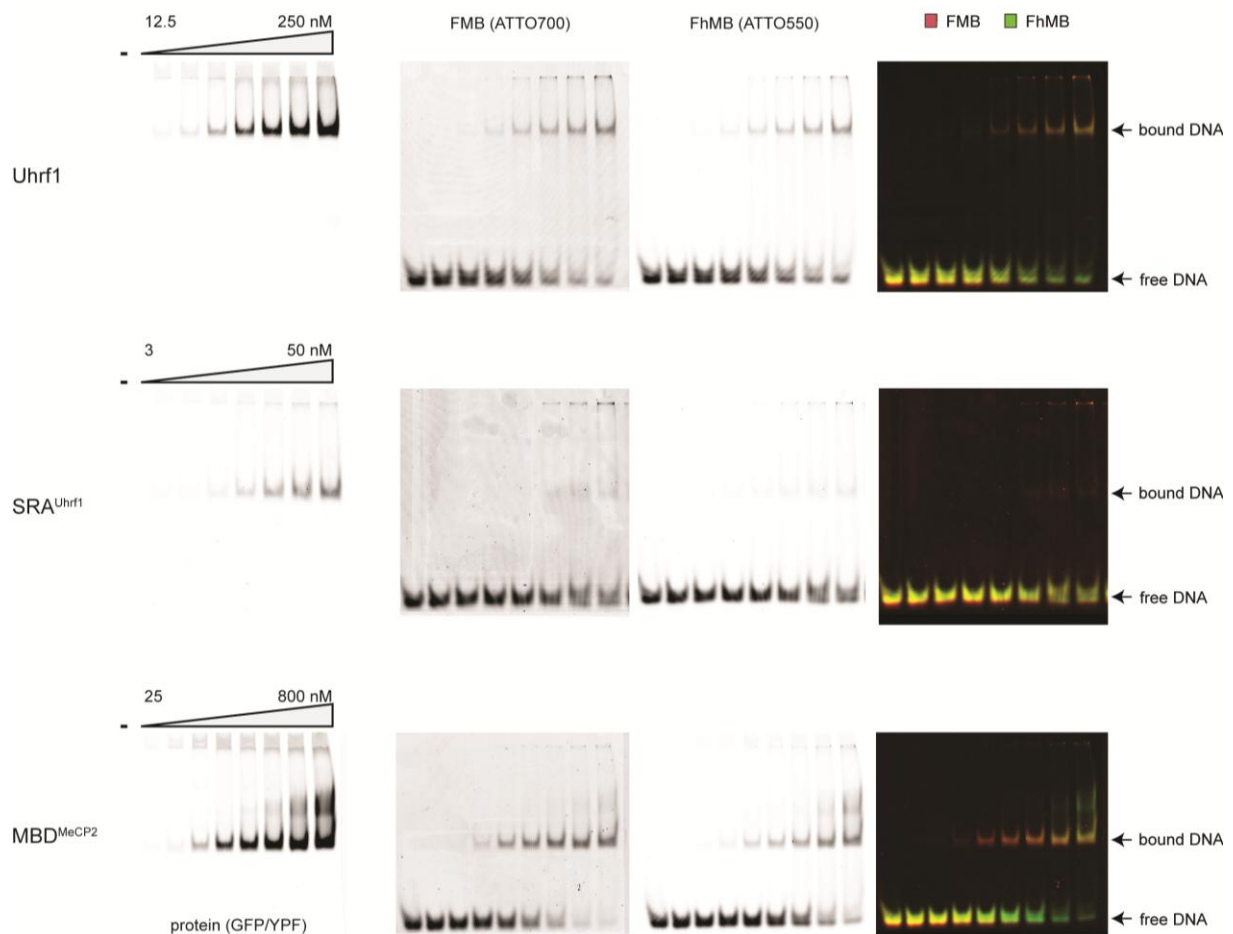

**Supplementary Figure S1. Electrophoretic mobility shift assays with methylated and hydroxymethylated DNA substrates.** Increasing amounts of Uhrf1, its SRA domain (SRA<sup>Uhrf1</sup>) or the MBD domain of MeCP2 (MBD<sup>MeCP2</sup>) were incubated with two differentially ATTO-labeled DNA substrates, which contain either one central fully methylated or fully hydroxymethylated CpG site (FMB-ATTO700 or FhMB-ATTO550, respectively), in direct competition. Samples were subjected to 6 % non-denaturing PAGE and analyzed with a Typhoon scanner (GE Healthcare). The first, second and third columns show the scans for GFP/YFP, ATTO700 and ATTO550 fluorescence, respectively. The overlay of the two ATTO channels is shown in the fourth column (FMB: red, FhMB:green).

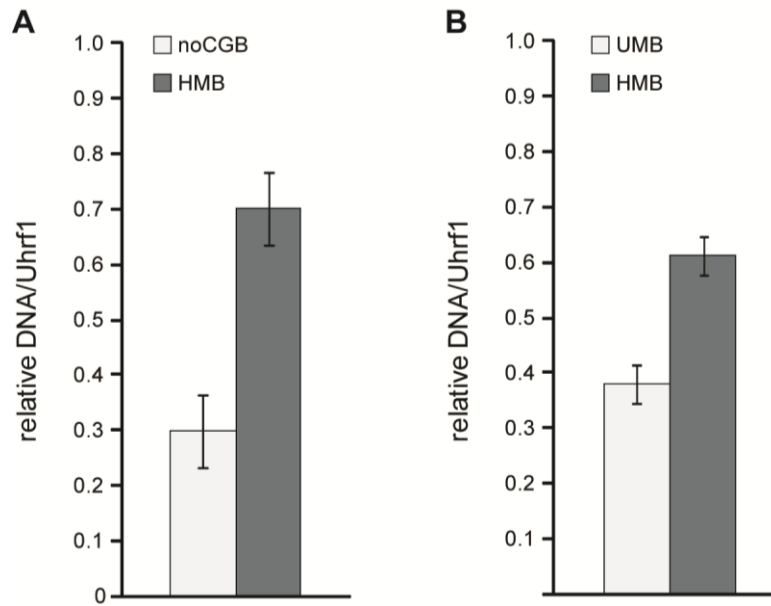

**Supplementary Figure S2. DNA binding specificity of Uhrf1.** Relative DNA/Uhrf1 ratios are shown for two differentially labeled fluorescent DNA substrates in direct competition. (A) Binding of Uhrf1 to DNA substrates containing no CpG site or one central hemimethylated CpG site (noCGB versus HMB, respectively). (B) Binding of Uhrf1 to DNA substrates containing one central un- or hemimethylated CpG site (UMB versus HMB, respectively). Results are shown as means of three independent experiments with standard deviation error bars. DNA substrates were prepared by hybridization as described in the main text, except for noCGB, which was prepared by primer extension as described previously [1]. See Supplementary Tables 1 and 2 for DNA oligonucleotide sequences and purification grade of the used substrates.

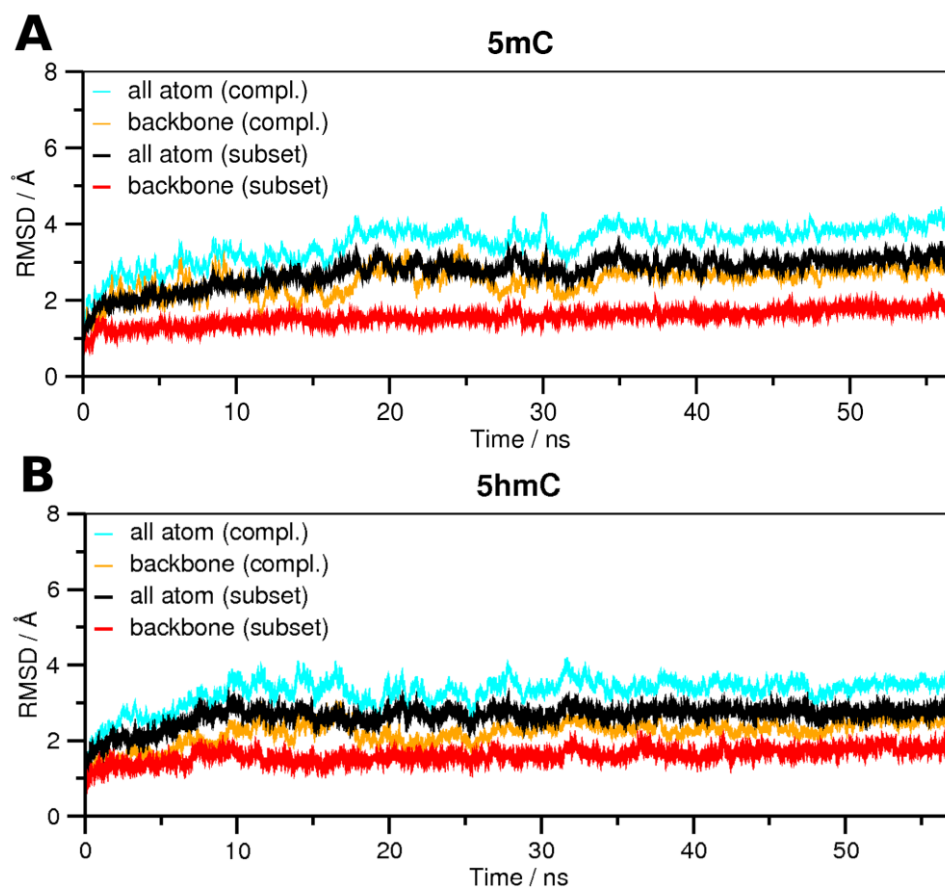

**Supplementary Figure S3. Atom-positional root-mean-square deviation of the protein and DNA backbone atoms during the simulations.** The terminal DNA and protein residues were excluded from the calculations in the “subset” sets (red and black lines).

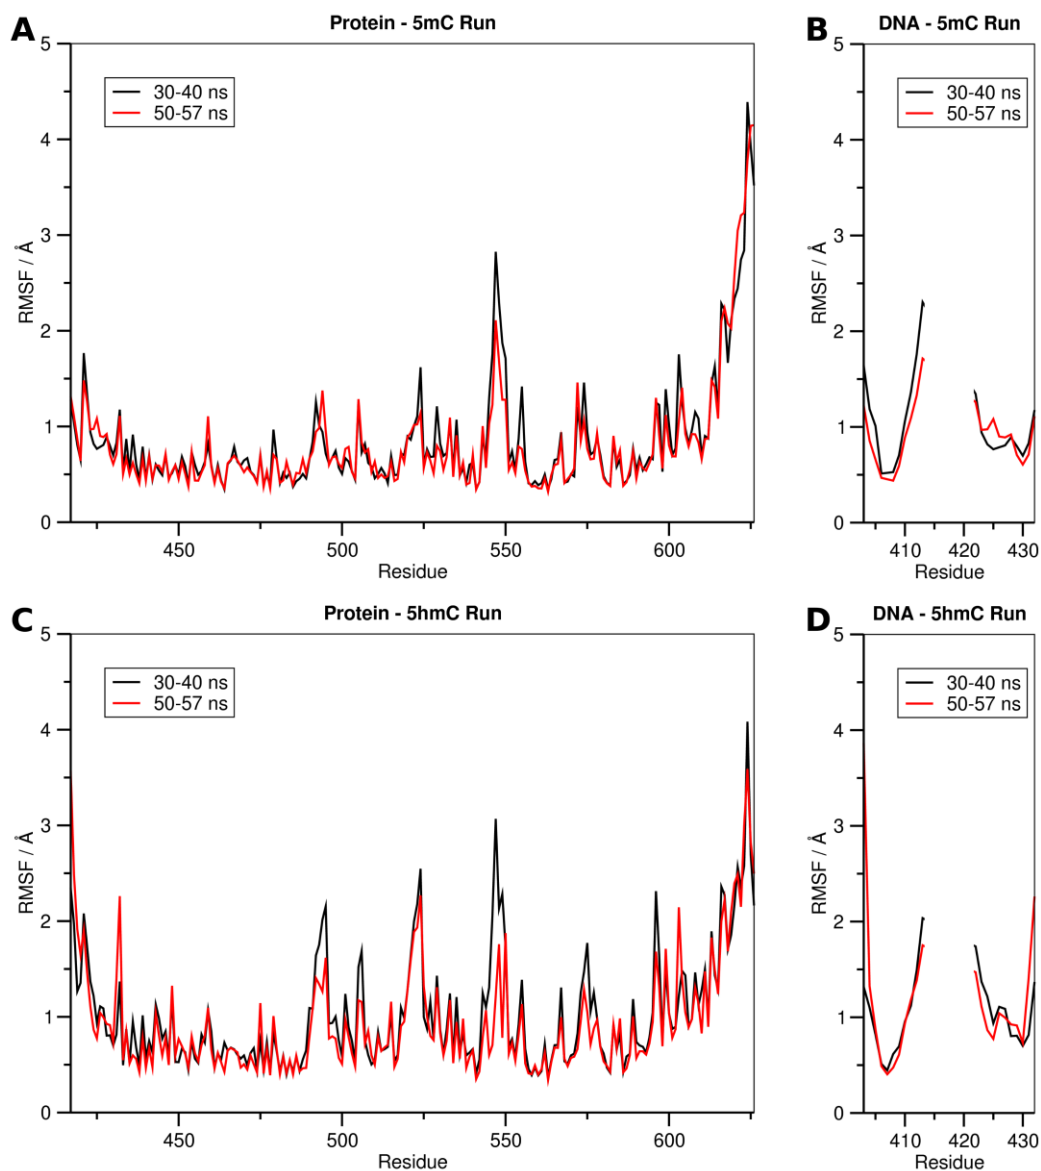

**Supplementary Figure S4. Atom-positional root-mean-square fluctuations of the protein (A, C) and both DNA strands (B, D) during two simulation periods.** Note that both structures show the same flexibility pattern during both simulation periods and are overall stable during both periods. This is in agreement with the RMSD data in Figure S3, which shows that equilibration is reached after 30 ns of simulation time.

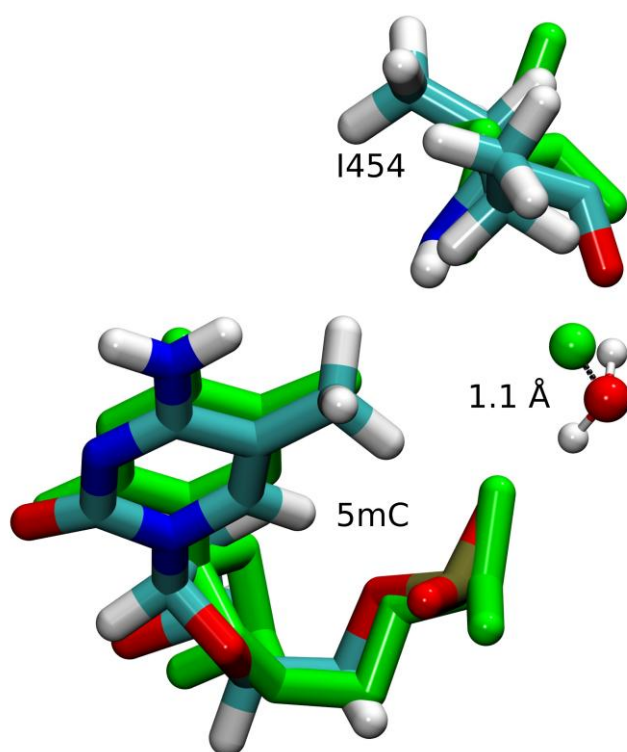

**Supplementary Figure S5. Superposition of the equilibrated 5mC structure after simulation (atom-name specific coloring) and the crystal structure (PDB-ID:3fde [2], green).** The 5mC nucleotide, the residue I454 of the SRA binding pocket and the conserved water molecule are shown. Note that the distance between the oxygen atoms of the conserved water molecules in the two structures is only 1.1 Å.



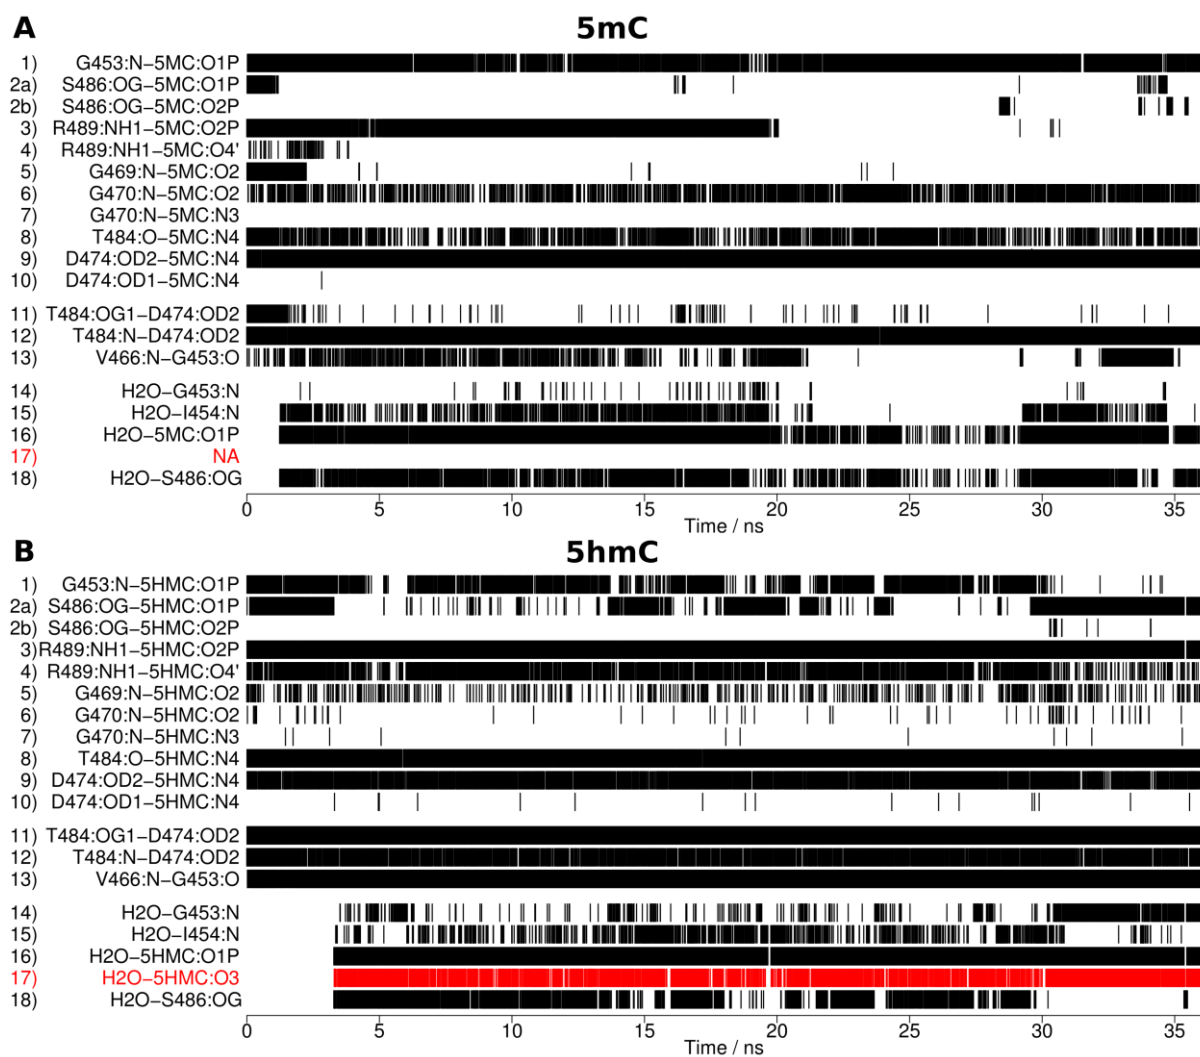

**Supplementary Figure S6. Molecular dynamics simulations of the Uhrf1 SRA domain in complex with 5mC (A) and 5hmC (B) containing DNA in 0.5 M NaCl.** Hydrogen bond occurrences during the simulation of the SRA:DNA complex using a concentration of 0.5 M NaCl.

## Supplementary References

1. Frauer C, Leonhardt H (2009) A versatile non-radioactive assay for DNA methyltransferase activity and DNA binding. *Nucleic Acids Res* 37: e22.
2. Hashimoto H, Horton JR, Zhang X, Bostick M, Jacobsen SE, et al. (2008) The SRA domain of UHRF1 flips 5-methylcytosine out of the DNA helix. *Nature* 455: 826-829.
